# Supplementary material for: Assembly of dysprosium(iii) cubanes in a metal–organic framework with an ecu topology and slow magnetic relaxation
Source: Royal Society of Chemistry journal article supplement (doi:10.1039/d3dt03137c), 2023-01-01
Supplement: d3dt03137c1.pdf [file d3dt03137c1.pdf]

# **Assembly of dysprosium(III) cubanes in metal–organic framework with ecu topology and single-molecule magnetism**

Dong Shao, <sup>\*a</sup> Yi Wan, <sup>a</sup> Jiong Yang, <sup>c</sup> Zhijun Ruan, <sup>a</sup> Junlun Zhu <sup>a</sup> and Le Shi <sup>\*b</sup>

<sup>a</sup> Hubei Key Laboratory of Processing and Application of Catalytic Materials, College of Chemistry and Chemical Engineering, Huanggang Normal University, Huanggang 438000, P. R. China

<sup>b</sup> Stoddart Institute of Molecular Science, Department of Chemistry, Zhejiang University, Hangzhou 310027, PR China

<sup>c</sup> Department of Chemistry, Southern University of Science and Technology (SUSTech), Shenzhen 518055, China

Correspondence and requests for materials should be addressed to

Email: shaodong@nju.edu.cn

## Table of Contents

|                                                                                                                                                                                         |    |
|-----------------------------------------------------------------------------------------------------------------------------------------------------------------------------------------|----|
| EXPERIMENTAL SECTION .....                                                                                                                                                              | 3  |
| Table S1. Crystallographic data and structure refinement parameters for Dy <sub>4</sub> -MOF at different measured temperature. ....                                                    | 6  |
| <b>Figure S1.</b> The photograph of a single crystal of <b>Dy<sub>4</sub>-MOF</b> . ....                                                                                                | 7  |
| <b>Figure S2.</b> The TGA curve of <b>Dy<sub>4</sub>-MOF</b> . ....                                                                                                                     | 8  |
| <b>Figure S3.</b> The IR spectra of <b>Dy<sub>4</sub>-MOF</b> . ....                                                                                                                    | 9  |
| <b>Figure S4.</b> The asymmetric units of <b>Dy<sub>4</sub>-MOF</b> and its model showing atomic displacement parameters (ADPs) without the disorder solvents. ....                     | 10 |
| Table S2. Continuous Shape Measure (CSM) analysis for eight-coordinated Dy(III) in Dy <sub>4</sub> -MOF. ....                                                                           | 11 |
| Table S3. Selected bond lengths (Å) in Dy <sub>4</sub> -MOF. ....                                                                                                                       | 12 |
| Table S4. Selected bond angles (Å) in Dy <sub>4</sub> -MOF. ....                                                                                                                        | 13 |
| <b>Figure S5.</b> Portion of the 3D framework structure of <b>Dy<sub>4</sub>-MOF</b> along the crystallographically <i>a</i> direction. ....                                            | 14 |
| Topology analysis of Dy <sub>4</sub> -MOF .....                                                                                                                                         | 15 |
| <b>Figure S6.</b> Curie-Weiss fit for <b>Dy<sub>4</sub>-MOF</b> . ....                                                                                                                  | 16 |
| <b>Figure S7.</b> Frequency dependence of ac susceptibility measured under zero dc field for <b>Dy<sub>4</sub>-MOF</b> . ....                                                           | 17 |
| <b>Figure S8.</b> Temperature dependence of the ac magnetic susceptibility measured under zero dc field for <b>Dy<sub>4</sub>-MOF</b> . ....                                            | 18 |
| <b>Figure S9.</b> $\tau^{-1}$ vs. <i>T</i> for <b>Dy<sub>4</sub>-MOF</b> fitted by using proposed models. ....                                                                          | 19 |
| <b>Figure S10.</b> The <i>M</i> vs. <i>H</i> curve measured at 1.8 K for <b>Dy<sub>4</sub>-MOF</b> . ....                                                                               | 20 |
| Table S5. Relaxation fitting parameters from the least-square fitting of the Cole-Cole plots of Dy <sub>4</sub> -MOF under 0 Oe dc field according to the generalized Debye model. .... | 21 |
| <b>Figure S11.</b> Calculated magnetic anisotropy axes of the Dy(III) ions using MAGELLAN software for <b>Dy<sub>4</sub>-MOF</b> . ....                                                 | 22 |
| References .....                                                                                                                                                                        | 23 |

## EXPERIMENTAL SECTION

**Materials and Synthesis.** All reagents were purchased from commercially available sources and used without further purification. The ligands H<sub>4</sub>dmbdc was directly bought from TCI chemicals.

**Synthesis of {[Dy<sub>4</sub>(μ<sub>3</sub>-OH)<sub>4</sub>(H<sub>2</sub>dmbdc)<sub>4</sub>(H<sub>2</sub>O)<sub>4</sub>]·(DMF)<sub>3</sub>(H<sub>2</sub>O)<sub>3</sub>]<sub>n</sub> (Dy<sub>4</sub>-MOF).** The hydrothermal method was employed to synthesize the coordination polymer. A mixture of Dy(NO<sub>3</sub>)<sub>3</sub>·6H<sub>2</sub>O (23mg, 0.05 mmol), H<sub>4</sub>dmbdc (20 mg, 0.1 mmol), DMF (1 mL), and water (6 mL) was placed in a 15 mL Teflon-coated stainless steel vessel and heated to 100 °C for 3 days. The vessel was then cooled to room temperature at a rate of 10 °C per hour. Yellow single crystals of **Dy<sub>4</sub>-MOF** were collected, with a yield of 52% (based on Dy<sup>3+</sup>). Elemental analysis calcd. (%) for C<sub>41</sub>H<sub>55</sub>Dy<sub>4</sub>O<sub>38</sub>N<sub>3</sub> (include DMF and H<sub>2</sub>O): C, 26.64; H, 3.00; N, 2.27. Found: C, 26.81, H, 2.53; N, 2.21. IR (KBr, cm<sup>-1</sup>, Figure S3): 3500-3000 (bs), 1656(s), 1544(w), 1445(s), 1113(vs), 783(w) cm<sup>-1</sup>.

### Physical measurements

Infrared spectra (IR) data were measured on KBr pellets using a Nexus 870 FT-IR spectrometer in the range of 4000-400 cm<sup>-1</sup>. Elemental analyses of C, H, and N were performed at an Elementar Vario MICRO analyzer. Powder X-ray diffraction data (PXRD) were recorded on a Bruker D8 Advance diffractometer with Cu Kα X-ray source (λ = 1.54056 Å) operated at 40 kV and 40 mA. Thermal gravimetric analysis (TGA) was measured in Al<sub>2</sub>O<sub>3</sub> crucibles using a PerkinElmer Thermal Analysis in the temperature range of 30-800 °C under an argon atmosphere.

### Magnetic measurements

Magnetic measurements from 2 to 300 K with applied direct current (dc) field up to 7 T were performed using a Quantum Design VSM and PPMS magnetometer on the

crushed samples from the single crystals of the compound. Alternative current (ac) magnetic susceptibility data were collected in a zero-dc field or an applied 1000 Oe dc fields in the temperature range of 2-8 K. All magnetic data were corrected for the diamagnetic contributions of the sample holder and of core diamagnetism of the sample using Pascal's constants.

### **X-ray Crystallography**

Single crystal X-ray diffraction data were collected on a Bruker D8 QUEST diffractometer with a PHOTON III area detector (Mo-K $\alpha$  radiation,  $\lambda = 0.71073$  Å, Bruker *Ius* 3.0) at 100 K. The APEX III program was used to determine the unit cell parameters and for data collection. The data were integrated and corrected for Lorentz and polarization effects using SAINT.<sup>S1</sup> Absorption corrections were applied with SADABS.<sup>S2</sup> The structures were solved by direct methods and refined by full-matrix least-squares method on  $F^2$  using the SHELXTL<sup>S3</sup> crystallographic software package integrated in Olex 2.<sup>S4</sup> All the non-hydrogen atoms were refined anisotropically. Hydrogen atoms of the organic ligands were refined as riding on the corresponding non-hydrogen atoms. SADABS-2016/2 (Bruker, 2016/2) was used for multi-scan absorption correction. The minimum of transmission is 0.0199, the maximum of transmission is 0.0453 and the ratio of minimum to maximum transmission is 0.4393, all of them are relatively small values. Notably, there are two H atoms were not added. Additional details of the data collections and structural refinement parameters are provided in Table 1. Selected bond lengths and angles of **Dy<sub>4</sub>-MOF** were listed in Table S1 and S2. CCDC 2179379 are the supplementary crystallographic data for this

paper. They can be obtained freely from the Cambridge Crystallographic Data Centre via [www.ccdc.cam.ac.uk/data\\_request/cif](http://www.ccdc.cam.ac.uk/data_request/cif).

**Table S1.** Crystallographic data and structure refinement parameters for **Dy<sub>4</sub>-MOF** at different measured temperature.

| Complex                                                                                                                                                                  | <b>Dy<sub>4</sub>-MOF</b>                                       |
|--------------------------------------------------------------------------------------------------------------------------------------------------------------------------|-----------------------------------------------------------------|
| Empirical formula                                                                                                                                                        | C <sub>32</sub> H <sub>20</sub> Dy <sub>4</sub> O <sub>32</sub> |
| Formula weight                                                                                                                                                           | 1566.48                                                         |
| <i>T</i> / K                                                                                                                                                             | 281                                                             |
| Crystal system                                                                                                                                                           | monoclinic                                                      |
| Space group                                                                                                                                                              | <i>P</i> 2 <sub>1</sub> /m                                      |
| <i>a</i> /Å                                                                                                                                                              | 13.442(4)                                                       |
| <i>b</i> /Å                                                                                                                                                              | 21.256(6)                                                       |
| <i>c</i> /Å                                                                                                                                                              | 17.195(5)                                                       |
| $\alpha$ /°                                                                                                                                                              | 90                                                              |
| $\beta$ /°                                                                                                                                                               | 108.984                                                         |
| $\gamma$ /°                                                                                                                                                              | 90                                                              |
| Volume/Å <sup>3</sup>                                                                                                                                                    | 4646(2)                                                         |
| <i>Z</i>                                                                                                                                                                 | 2                                                               |
| $\rho_{\text{calc}}$ g/cm <sup>3</sup>                                                                                                                                   | 1.564                                                           |
| $\mu$ /mm <sup>-1</sup>                                                                                                                                                  | 3.332                                                           |
| <i>F</i> (000)                                                                                                                                                           | 2144.0                                                          |
| 2 $\Theta$ range for data collection/°                                                                                                                                   | 3.93 to 53.178                                                  |
| Reflections collected                                                                                                                                                    | 34784                                                           |
| Independent reflections                                                                                                                                                  | 9459                                                            |
| <i>R</i> <sub>int</sub> / <i>R</i> <sub>sigma</sub>                                                                                                                      | 0.0620 / 0.0628                                                 |
| Goodness-of-fit on <i>F</i> <sup>2</sup>                                                                                                                                 | 0.994                                                           |
| <i>R</i> <sub>1</sub> <sup>a</sup> / <i>wR</i> <sub>2</sub> <sup>b</sup> ( <i>I</i> > 2 $\sigma$ ( <i>I</i> ))                                                           | 0.0391 / 0.1070                                                 |
| <i>R</i> <sub>1</sub> / <i>wR</i> <sub>2</sub> (all data)                                                                                                                | 0.0508 / 0.1122                                                 |
| Max/min [e Å <sup>-3</sup> ]                                                                                                                                             | 1.21/-1.21                                                      |
| <sup>a</sup> <i>R</i> <sub>1</sub> = $\sum   F_o  -  F_c   / \sum  F_o $ <sup>b</sup> <i>wR</i> <sub>2</sub> = $\{\sum [w(F_o^2 - F_c^2)^2] / \sum [w(F_o^2)^2]\}^{1/2}$ |                                                                 |

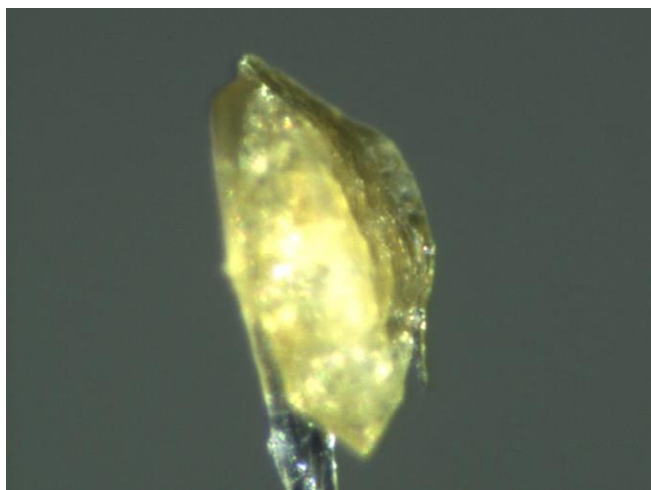

**Figure S1.** The photograph of a single crystal of **Dy<sub>4</sub>-MOF**.

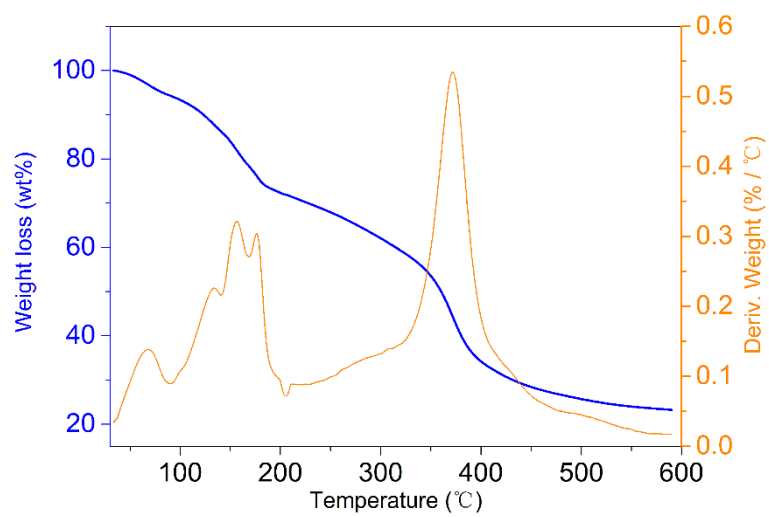

**Figure S2.** The TGA curve of **Dy<sub>4</sub>-MOF**.

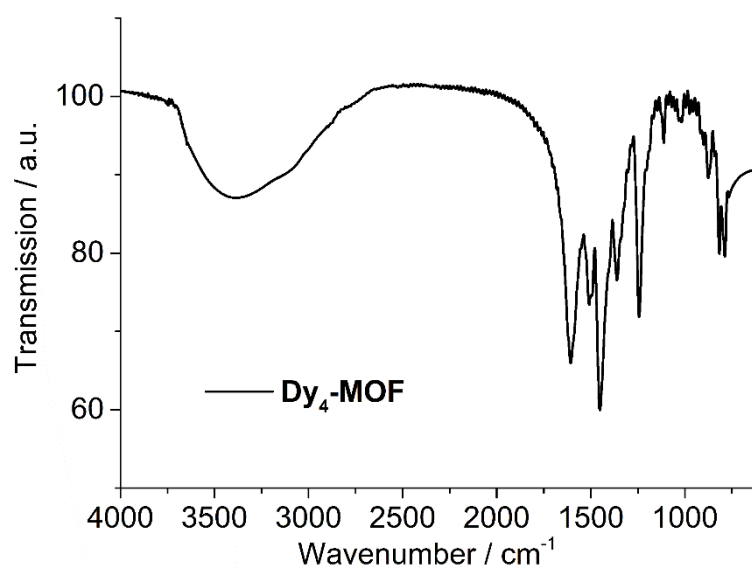

**Figure S3.** The IR spectra of **Dy<sub>4</sub>-MOF**.

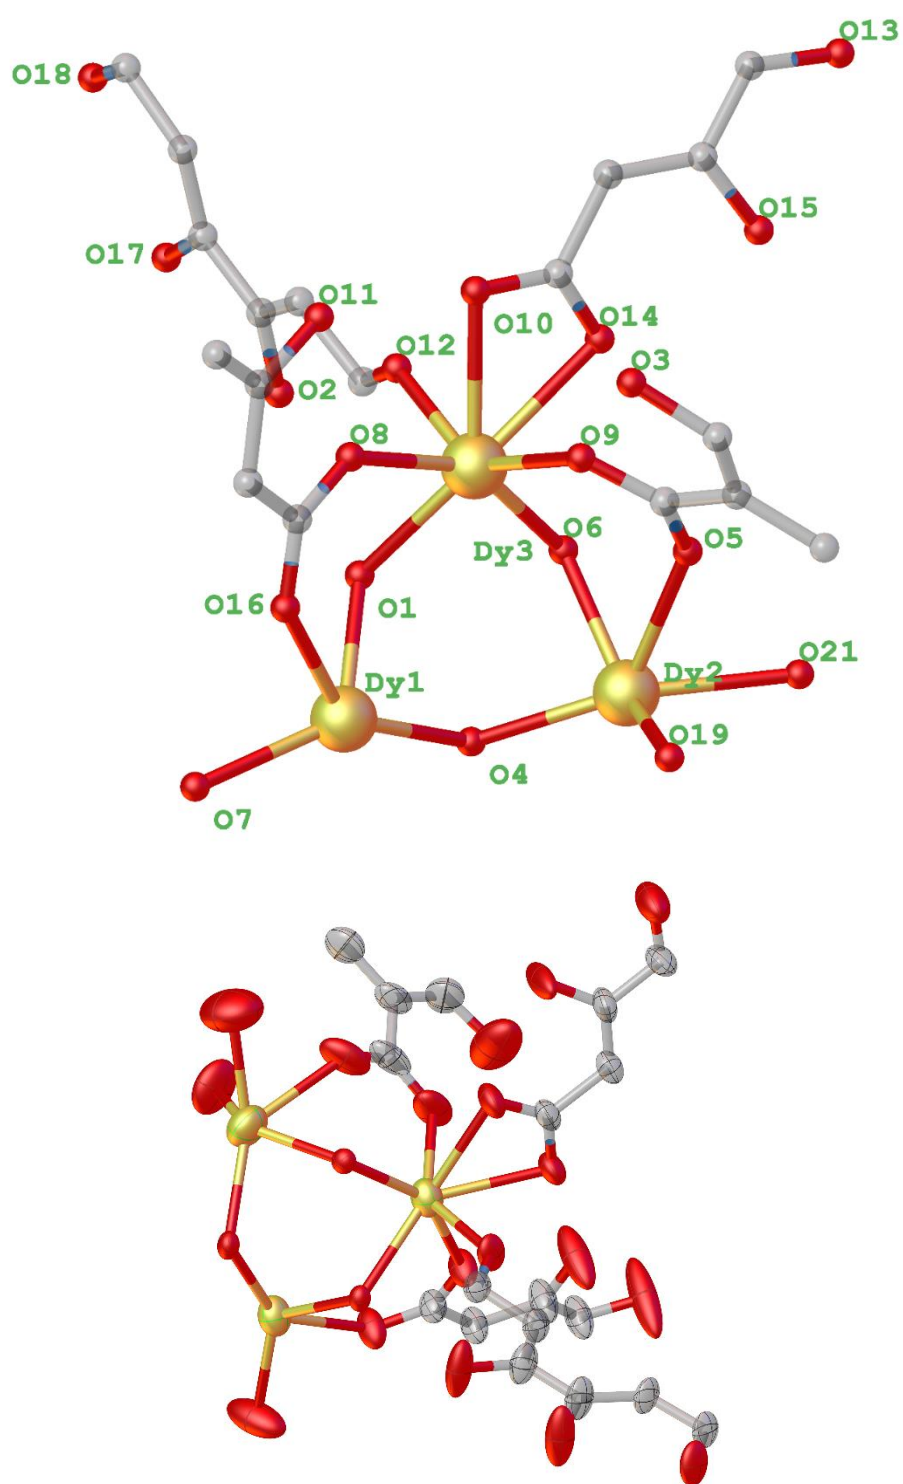

**Figure S4.** The asymmetric units of **Dy<sub>4</sub>-MOF** and its model showing atomic displacement parameters (ADPs) without the disorder solvents.

**Table S2.** Continuous Shape Measure (CSM) analysis for eight-coordinated Dy(III) in **Dy4-MOF**.

| Eight-coordinated coordination sphere label | Shape                                          | CSM parameters |              |              | Determined coordination geometry |
|---------------------------------------------|------------------------------------------------|----------------|--------------|--------------|----------------------------------|
|                                             |                                                | Dy1            | Dy2          | Dy3          |                                  |
| OP-8                                        | Octagon                                        | 29.947         | 29.547       | 28.000       |                                  |
| HPY-8                                       | Heptagonal pyramid                             | 22.216         | 23.629       | 21.807       |                                  |
| HBPY-8                                      | Hexagonal bipyramid                            | 17.076         | 16.501       | 13.679       |                                  |
| CU-8                                        | Cube                                           | 11.315         | 11.387       | 11.736       |                                  |
| SAPR-8                                      | Square antiprism                               | <b>1.221</b>   | <b>1.157</b> | 2.461        | <b>SAPR-8</b>                    |
| TDD-8                                       | Triangular dodecahedron                        | 3.676          | 2.001        | <b>1.633</b> | <b>TDD-8</b>                     |
| JGBF-8                                      | Johnson - Gyrobifastigium (J26)                | 16.229         | 14.124       | 12.036       |                                  |
| JETBPY-8                                    | Johnson - Elongated triangular bipyramid (J14) | 26.963         | 28.107       | 27.483       |                                  |
| JBTP-8                                      | Johnson - Biaugmented trigonal prism (J50)     | 3.547          | 1.797        | 2.162        |                                  |
| BTPR-8                                      | Biaugmented trigonal prism                     | 2.386          | <b>1.273</b> | <b>1.636</b> | <b>BTPR-8</b>                    |
| JSD-8                                       | Snub disphenoid (J84)                          | 6.443          | 4.223        | 2.625        |                                  |
| TT-8                                        | Triakis tetrahedron                            | 11.946         | 12.071       | 12.523       |                                  |
| ETBPY-8                                     | Elongated trigonal bipyramid (see 8)           | 22.357         | 23.544       | 24.167       |                                  |

**Table S3.** Selected bond lengths (Å) in **Dy<sub>4</sub>-MOF**.

| Bond                                                                        | Lengths (Å) | Bond                     | Lengths (Å) | Bond                     | Lengths (Å) |
|-----------------------------------------------------------------------------|-------------|--------------------------|-------------|--------------------------|-------------|
| Dy1-O1                                                                      | 2.328(4)    | Dy2-O4                   | 2.359(3)    | Dy3-O1                   | 2.387(3)    |
| Dy1-O4                                                                      | 2.359(3)    | Dy2-O4 <sup>1</sup>      | 2.359(3)    | Dy3-O4 <sup>1</sup>      | 2.402(3)    |
| Dy1-O4 <sup>1</sup>                                                         | 2.359(3)    | Dy2-O5 <sup>1</sup>      | 2.412(5)    | Dy3-O6                   | 2.336(3)    |
| Dy1-O16 <sup>1</sup>                                                        | 2.350(4)    | Dy2-O5                   | 2.412(5)    | Dy3-O8                   | 2.276(3)    |
| Dy1-O16                                                                     | 2.350(4)    | Dy2-O6                   | 2.388(4)    | Dy3-O9                   | 2.377(4)    |
| Dy1-O18 <sup>2</sup>                                                        | 2.454(4)    | Dy2-O19 <sup>1</sup>     | 2.387(5)    | Dy3-O10                  | 2.472(3)    |
| Dy1-O18 <sup>3</sup>                                                        | 2.454(4)    | Dy2-O19                  | 2.387(5)    | Dy3-O12                  | 2.344(3)    |
| Dy1-O7                                                                      | 2.349(7)    | Dy2-O21                  | 2.365(8)    | Dy3-O14                  | 2.446(4)    |
| Dy1/O <sub>average</sub>                                                    | 2.375       | Dy2/O <sub>average</sub> | 2.384       | Dy3/O <sub>average</sub> | 2.380       |
| Dy1-Dy2                                                                     | 3.8673(9)   | Dy1-Dy3                  | 3.8199(6)   | Dy1-Dy3 <sup>1</sup>     | 3.8200(6)   |
| Dy2-Dy3                                                                     | 3.6980(5)   | Dy2-Dy3 <sup>1</sup>     | 3.6980(5)   | Dy3-Dy3 <sup>1</sup>     | 3.7382(8)   |
| <sup>1</sup> +X,1/2-Y,+Z; <sup>2</sup> 1+X,+Y,+Z; <sup>3</sup> 1+X,1/2-Y,+Z |             |                          |             |                          |             |

**Table S4.** Selected bond angles (Å) in **Dy4-MOF**.

| Parameter                                        | bond angles (Å) |
|--------------------------------------------------|-----------------|
| Dy3 <sup>1</sup> -Dy1-Dy2                        | 57.504(10)      |
| Dy3-Dy1-Dy3 <sup>1</sup>                         | 58.589(14)      |
| Dy1-O1-Dy3                                       | 108.24(12)      |
| Dy3-O1-Dy3 <sup>1</sup>                          | 103.10(16)      |
| Dy1-O4-Dy3 <sup>1</sup>                          | 106.71(12)      |
| Dy2-O4-Dy1                                       | 110.08(13)      |
| Dy2-O4-Dy3 <sup>1</sup>                          | 101.92(12)      |
| Dy3-O6-Dy2                                       | 103.02(13)      |
| Dy3-O6-Dy3 <sup>1</sup>                          | 106.28(17)      |
| O1-Dy1-O4                                        | 70.39(11)       |
| O1-Dy1-O16                                       | 83.91(11)       |
| O1-Dy1-O7                                        | 126.7(3)        |
| O4-Dy1-O4 <sup>1</sup>                           | 68.07(15)       |
| O16 <sup>1</sup> -Dy1-O4                         | 78.47(13)       |
| O16-Dy1-O4 <sup>1</sup>                          | 78.47(13)       |
| O7-Dy1-O4 <sup>1</sup>                           | 143.90(12)      |
| O7-Dy1-O16                                       | 73.13(14)       |
| O19-Dy1-O19 <sup>1</sup>                         | 70.2(3)         |
| O21-Dy2-O5                                       | 71.64(19)       |
| O21-Dy2-O6                                       | 99.5(4)         |
| O1-Dy3-O10                                       | 137.15(13)      |
| O1-Dy3-O14                                       | 140.93(13)      |
| O9-Dy3-O1                                        | 141.14(15)      |
| O9-Dy3-O10                                       | 72.48(15)       |
| O12-Dy3-O9                                       | 143.16(14)      |
| <sup>1</sup> 1-X,1-Y,-Z; <sup>2</sup> -X,1-Y,1-Z |                 |

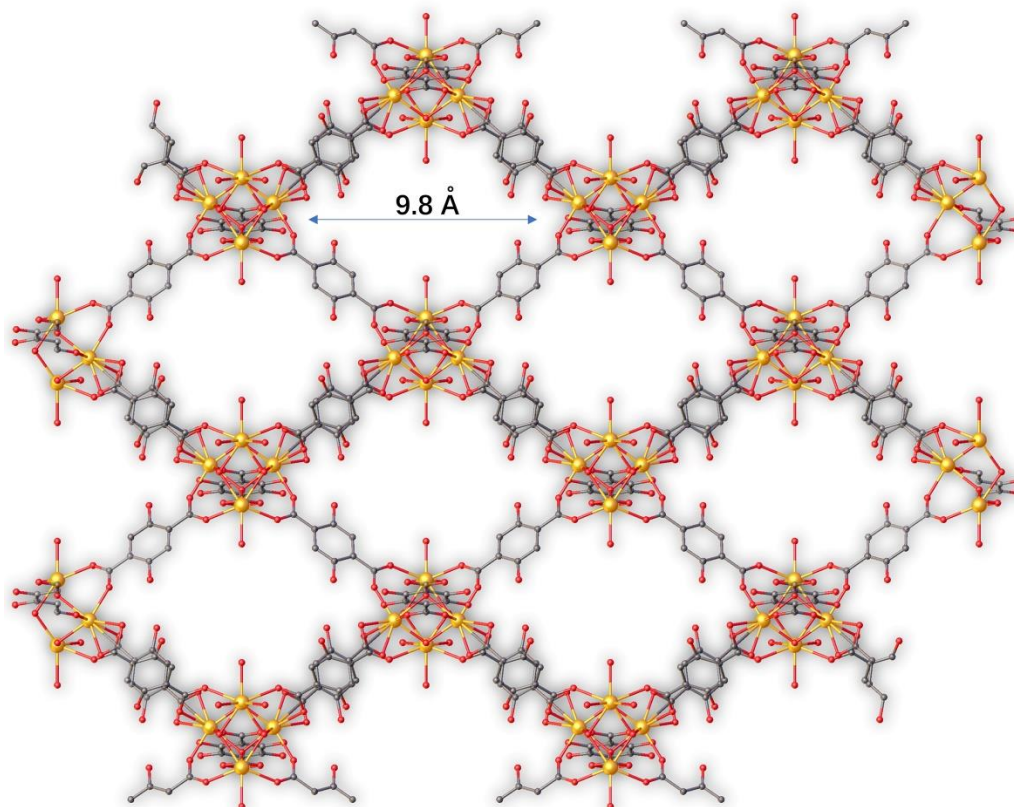

**Figure S5.** Portion of the 3D framework structure of **Dy<sub>4</sub>-MOF** along the crystallographically *a* direction.

### Topology analysis of Dy<sub>4</sub>-MOF

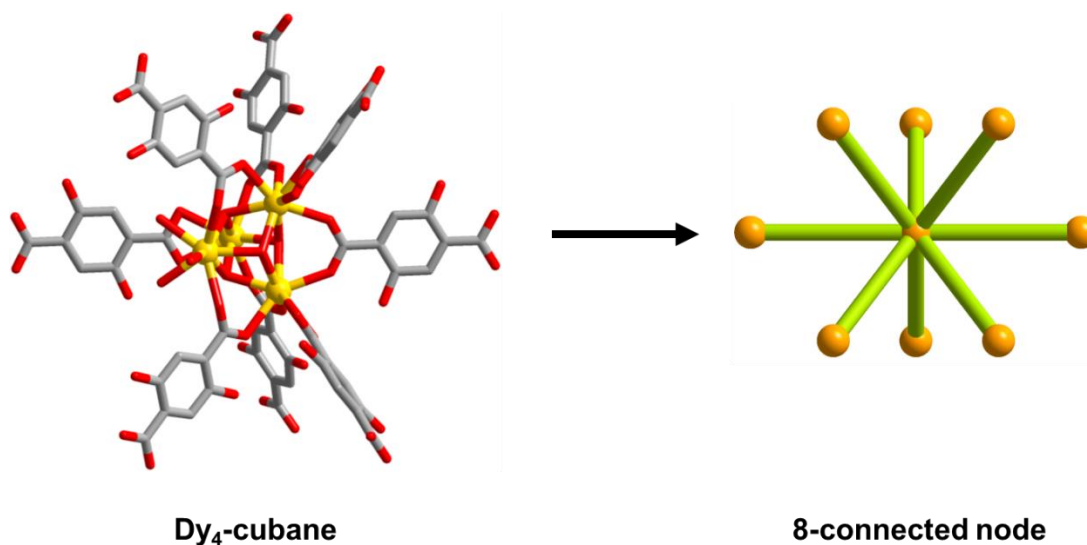

Prior to topological analysis, the structure has been simplified to its points of extension.

The cubane cluster is then reduced to an 8-connected node (***α***)

The Dy<sub>4</sub>-MOF exhibits an 8-connected **ecu** topology.

Point symbol for net: 3<sup>6</sup>.4<sup>15</sup>.5<sup>7</sup>; 8-c uninodal net

Topological terms for each node:

**(*α*) Point symbol:** 3<sup>6</sup>.4<sup>15</sup>.5<sup>7</sup>.

**Extended point symbol:**

3.3.3.3.3.3.4.4.4.4.4.4.4.4(2).4(2).4(2).5(5).5(5).4.4.4.4.5.5.5.5.5(2)

**Coordination sequences:** 8 28 60 106 164 236 320 418 528 652

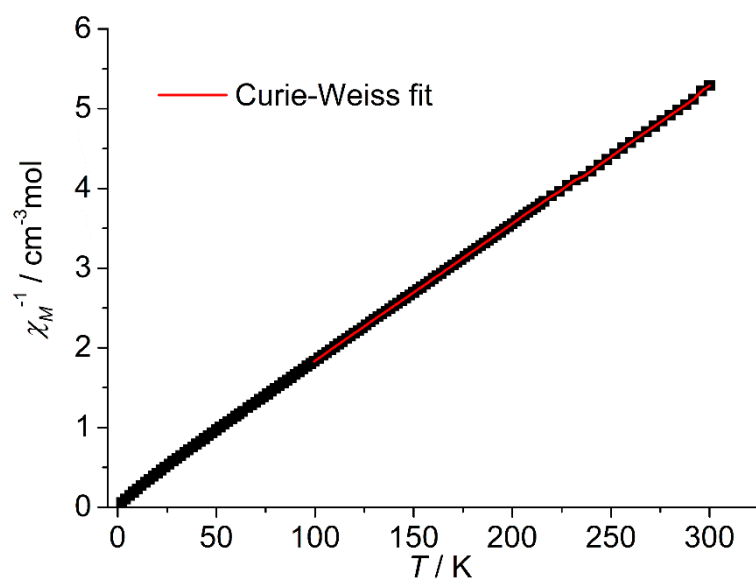

**Figure S6.** Curie-Weiss fit for **Dy<sub>4</sub>-MOF**.

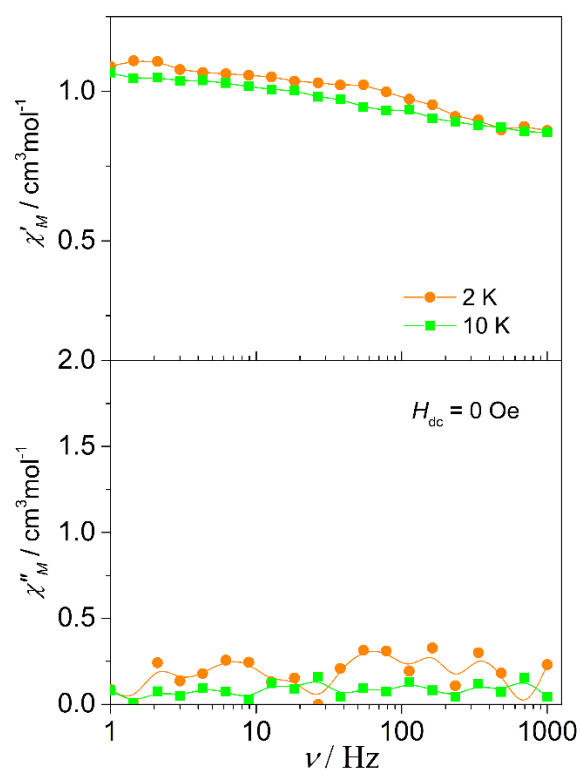

**Figure S7.** Frequency dependence of ac susceptibility measured under zero dc field for Dy4-MOF.

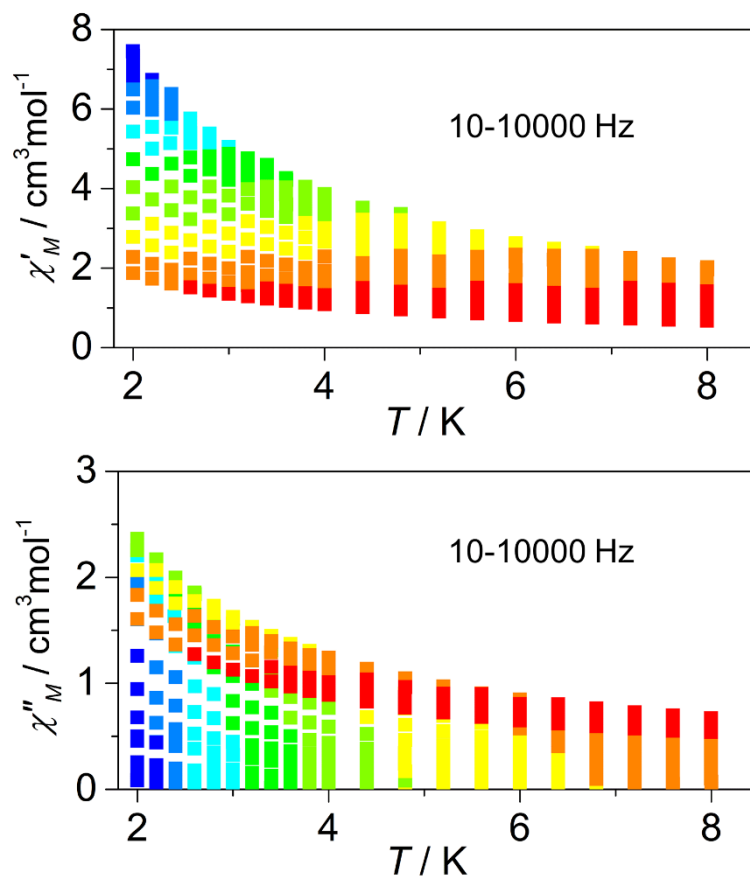

**Figure S8.** Temperature dependence of the ac magnetic susceptibility measured under zero dc field for **Dy<sub>4</sub>-MOF**.

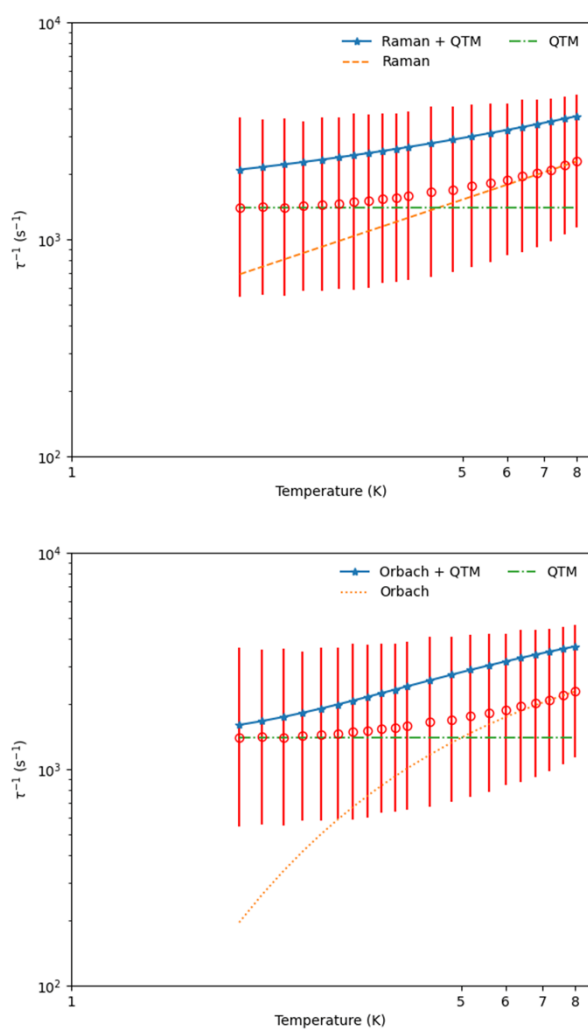

**Figure S9.**  $\tau^{-1}$  vs.  $T$  for Dy $_4$ -MOF fitted by using proposed models.

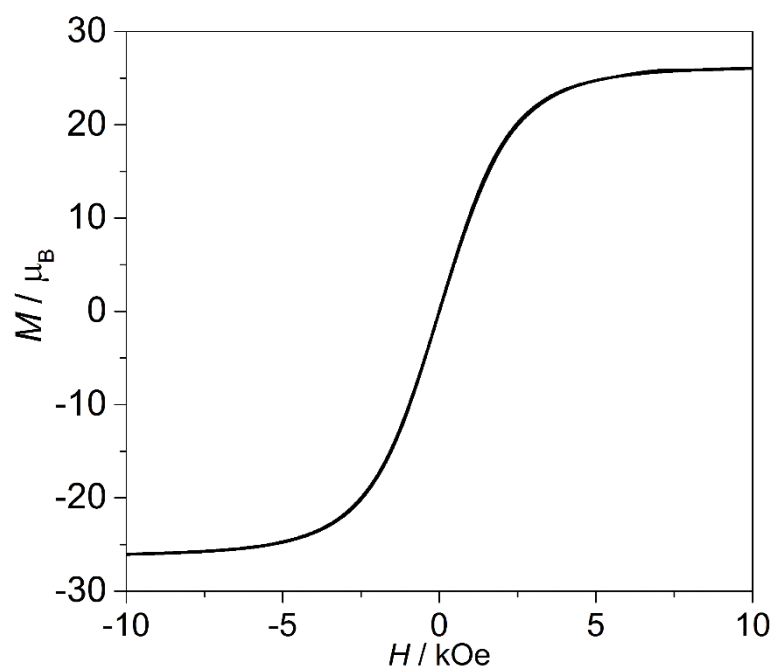

**Figure S10.** The  $M$  vs.  $H$  curve measured at 1.8 K for  $\text{Dy}_4\text{-MOF}$ .

**Table S5.** Relaxation fitting parameters from the least-square fitting of the Cole-Cole plots of **Dy<sub>4</sub>-MOF** under 0 Oe dc field according to the generalized Debye model.

| T / K   | $\tau$ / s | $\chi_S$ / cm <sup>3</sup> mol <sup>-1</sup> K | $\chi_T$ / cm <sup>3</sup> mol <sup>-1</sup> K | $\alpha$ |
|---------|------------|------------------------------------------------|------------------------------------------------|----------|
| 2.00005 | 7.11676E-4 | 0.92688                                        | 7.16538                                        | 0.18288  |
| 2.20009 | 7.09302E-4 | 0.884                                          | 6.57072                                        | 0.17765  |
| 2.39948 | 7.1265E-4  | 0.83033                                        | 6.09784                                        | 0.17968  |
| 2.60018 | 7.031E-4   | 0.80983                                        | 5.63089                                        | 0.16934  |
| 2.80014 | 6.89681E-4 | 0.7414                                         | 5.25428                                        | 0.17355  |
| 3.00009 | 6.82004E-4 | 0.70684                                        | 4.93102                                        | 0.17211  |
| 3.20019 | 6.70074E-4 | 0.64907                                        | 4.6546                                         | 0.17868  |
| 3.40022 | 6.64366E-4 | 0.63505                                        | 4.40419                                        | 0.17434  |
| 3.60003 | 6.483E-4   | 0.61441                                        | 4.14927                                        | 0.16803  |
| 3.8002  | 6.40623E-4 | 0.59404                                        | 3.95049                                        | 0.1669   |
| 4.00006 | 6.2949E-4  | 0.56474                                        | 3.76895                                        | 0.16853  |
| 4.40003 | 6.03705E-4 | 0.51251                                        | 3.43961                                        | 0.16996  |
| 4.79999 | 5.90096E-4 | 0.49717                                        | 3.17428                                        | 0.16266  |
| 5.19997 | 5.66238E-4 | 0.4654                                         | 2.93007                                        | 0.15859  |
| 5.59995 | 5.48872E-4 | 0.44495                                        | 2.7283                                         | 0.15346  |
| 5.99991 | 5.29865E-4 | 0.42972                                        | 2.54456                                        | 0.14416  |
| 6.39987 | 5.11739E-4 | 0.40213                                        | 2.39805                                        | 0.14457  |
| 6.79984 | 4.96419E-4 | 0.38815                                        | 2.26622                                        | 0.13862  |
| 7.19984 | 4.78924E-4 | 0.37669                                        | 2.14124                                        | 0.12965  |
| 7.59978 | 4.56558E-4 | 0.35682                                        | 2.02827                                        | 0.1242   |
| 7.99982 | 4.37253E-4 | 0.34405                                        | 1.93018                                        | 0.11681  |

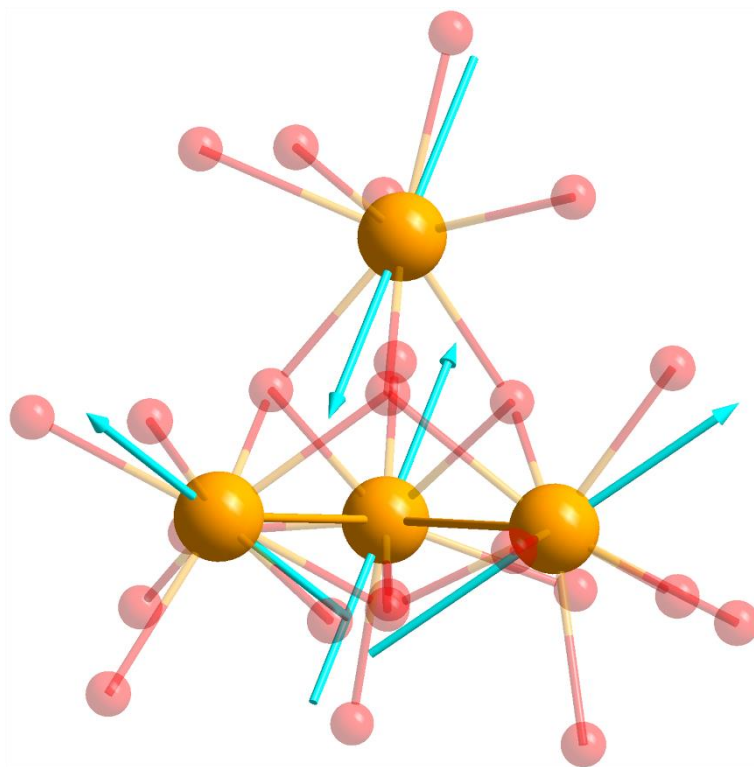

**Figure S11.** Calculated magnetic anisotropy axes of the Dy(III) ions using MAGELLAN software for **Dy<sub>4</sub>-MOF**.

## References

- 1) SAINT Software Users Guide, version 7.0; Bruker Analytical X-Ray Systems: Madison, WI, 1999.
- 2) G. M. Sheldrick, SADABS, version 2.03; Bruker Analytical X-Ray Systems, Madison, WI, 2000.
- 3) G. M. Sheldrick, SHELXTL, Version 6.14, Bruker AXS, Inc.; Madison, WI 2000-2003.
- 4) Dolomanov, O. V.; Bourhis, L. J.; Gildea, R. J.; Howard, J. A. K.; Puschmann, H. OLEX2: A Complete Structure Solution, Refinement and Analysis Program. *J. Appl. Crystallogr.*, 2009, 42, 339–341.
